# Supplementary material for: Sensory feedback synchronizes motor and sensory neuronal networks in the neonatal rat spinal cord
Source: PubMed Central journal article supplement (PMC5494195; doi:10.1038/ncomms13060), 2016-10-07
Supplement: ncomms13060-s1.pdf [file ncomms13060-s1.pdf]

## Supplementary figures and figure legends

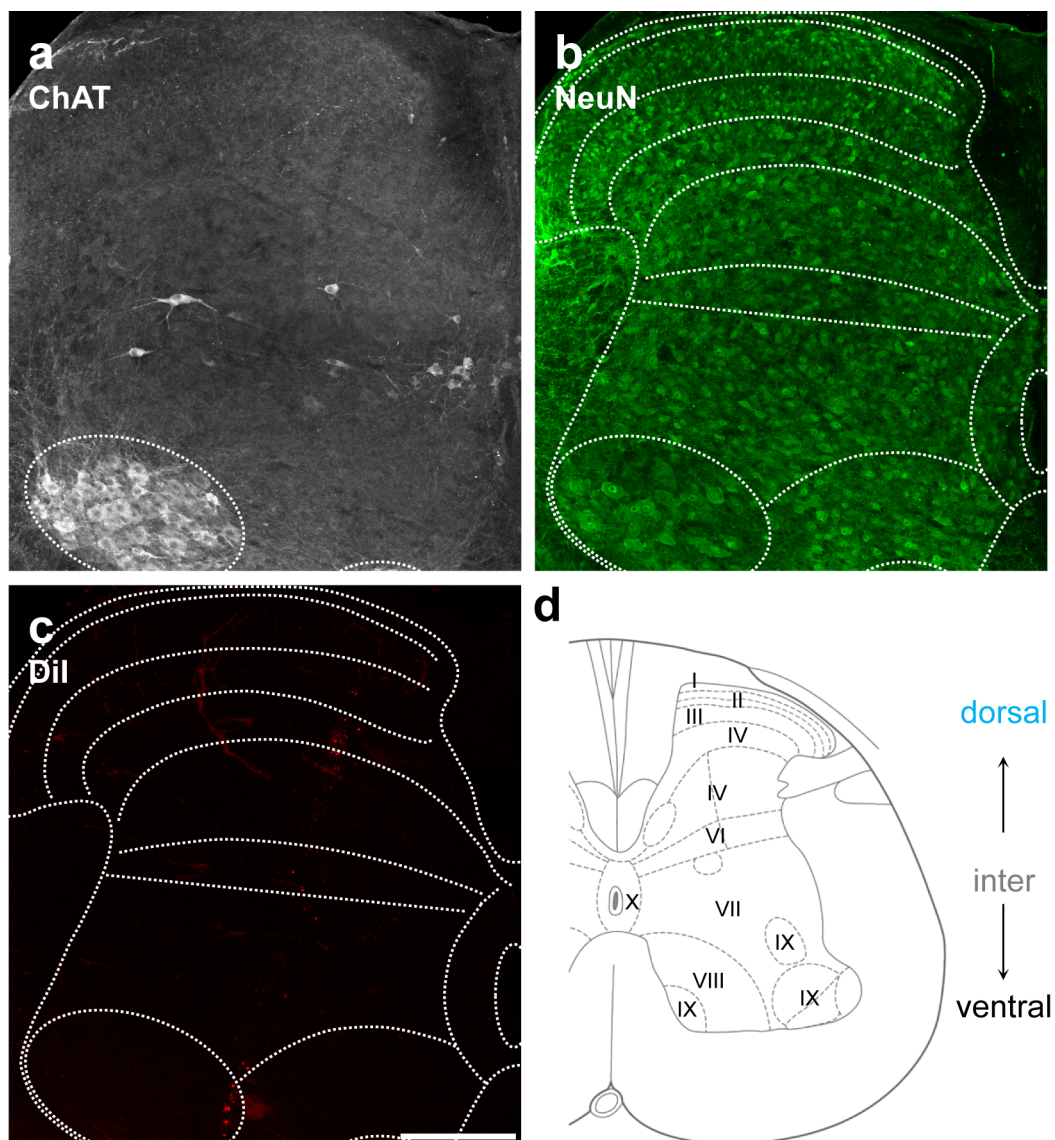

**Supplementary Figure 1 | Histological analysis.** (a-c) Confocal micrographs (Z-projections) of ChAT (Alexa633, gray-scale), NeuN (Alexa488, green) and Dil (red) signals within a transverse spinal cord slice (same as in Fig. 1b, L3). Scale bar: 200  $\mu$ m. (d) Anatomical organization of the lumbar spinal cord (segment L3) in adult rats (adapted from<sup>1</sup>). These data were used to extrapolate the location of each recording site, particularly with respect to different spinal cord laminae.

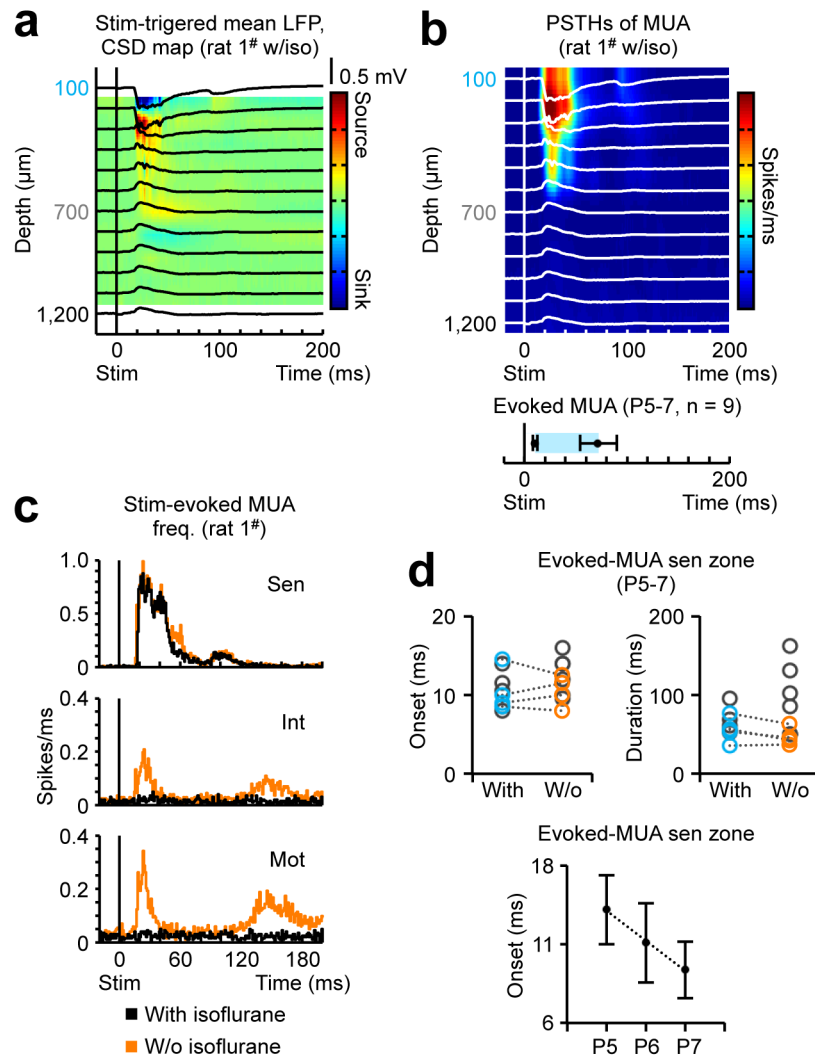

**Supplementary Figure 2 | Isoflurane suppresses ventral horn activation by sensory stimulation. (a)**

Mechanical stimulus (stim)-triggered mean LFP traces and CSD map ( $n \approx 100$  stimuli, single anesthetized animal - 0.5 % isoflurane). Changes in extracellular potential are qualitatively equivalent to those observed when the animals were not administered isoflurane (Fig. 2b, same animal and stimulation point). **(b)** Corresponding normalized PSTHs of MUA. **(c)** Normalized PSTHs of MUA in sensory zone (sen, depths of 100 and 200  $\mu\text{m}$ ), intermediate zone (int, depths of 800 and 900  $\mu\text{m}$ ) and motor zone (mot, depths of 1100 and 1200  $\mu\text{m}$ ) in the presence and absence of isoflurane (black and orange, respectively, single animal). As evidenced in **a-c**, isoflurane suppresses stim-triggered ventral horn activation. **(d)** Top: Stim-evoked sen MUA burst onset and duration under 0.5 % or no isoflurane per animal ( $n = 9-10$  for each of the conditions tested); in 4 animals, responses

were recorded in both conditions (blue and orange data points, respectively). No difference was found when comparing within-burst MUA frequency (paired data,  $n = 4$ , paired two-tailed Student's  $t$ -test), bursts onset and duration (pooled data,  $n = 10$  with isoflurane and  $n = 9$  without isoflurane, Wilcoxon rank-sum test). These results are consistent with a previous study showing that isoflurane at low concentrations ( $< 1.5\%$ ) does not produce a significant effect over cortical sensory responses in neonatal rats (first postnatal week)<sup>2</sup>. Bottom: Stim-triggered MUA burst onsets per age group in pooled isoflurane and non-isoflurane data (mean  $\pm$  s.d., 4-6 animals per age group,  $P = 0.0531$ , Kruskal-Wallis test).

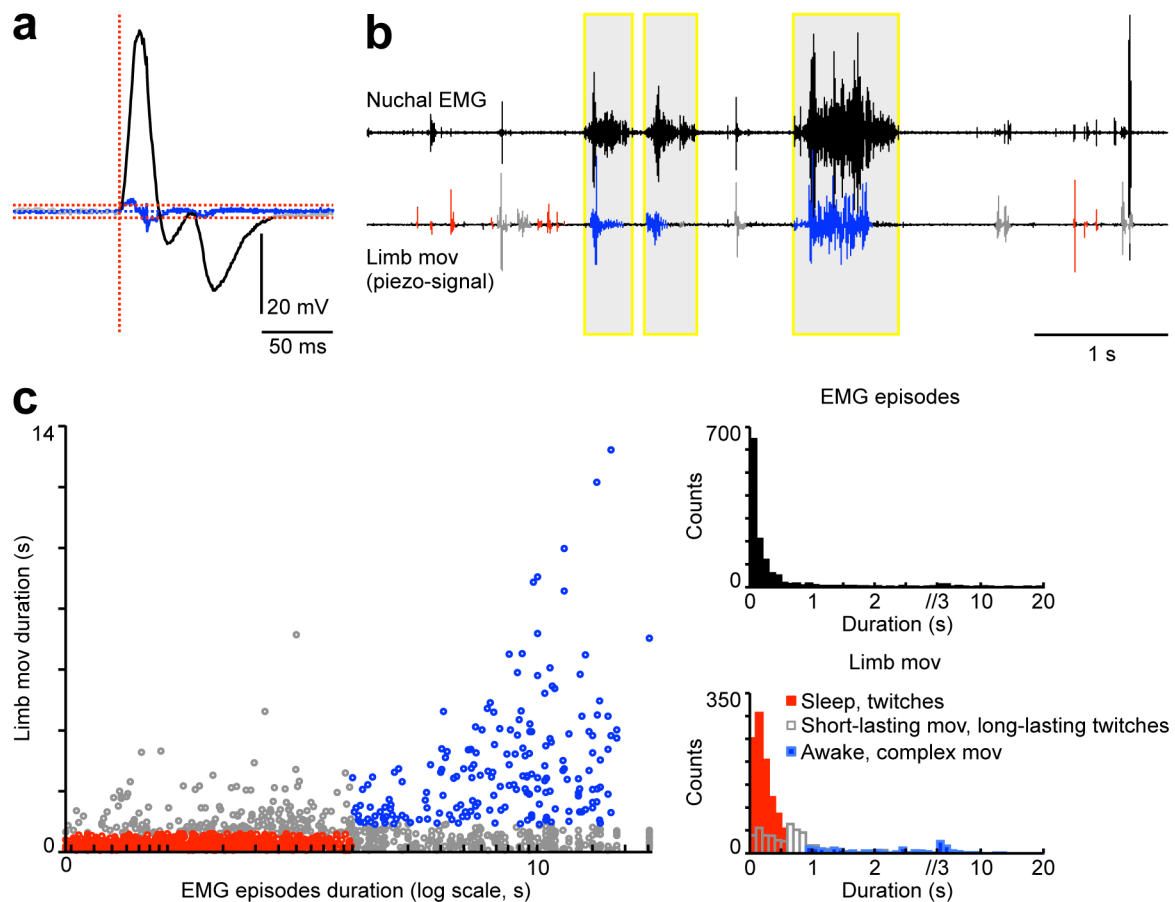

**Supplementary Figure 3 | Movement and sleep-awake cycles detection.** **(a)** Exemplification of the semi-automatic movement detection; original limb movement signal (gray: baseline, black: detected twitch; red horizontal dashed lines: threshold; blue horizontal line: signal first-derivative; red vertical dashed line: onset). All detected events lasting less than 600 ms were considered putative twitches. Putative twitches were further classified, manually, as twitches or short-lasting movements based on existence of preceding or following activity. Events lasting more than 900 ms were considered complex movements. **(b)** Traces exemplifying simultaneously recorded nuchal EMG (gray bars denote EMG events lasting more than 1 s, considered as awake states) and piezo-derived limb movements (mov) signal (red: events lasting less than 600 ms, associated to EMG events lasting up to 1 s; blue: events lasting more than 900 ms, associated to EMG events lasting more than 1 s; gray: all others). **(c)** Scatter plot of durations of detected episodes of nuchal EMG activity associated with

overt limb movement(s), and respective histograms (n = 1237 EMG activity bouts and 1698 movements of 3 animals).

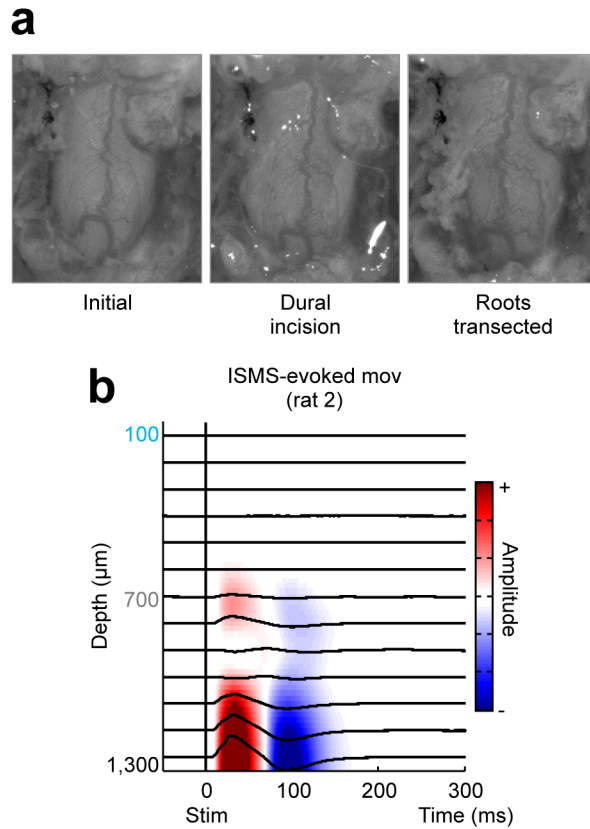

**Supplementary Figure 4| *In vivo* local deafferentation procedure.** **a)** Macroscopic pictures representing the local deafferentation performed, in this case, in a P7 animal. We first made a rostral-caudal dura matter incision, over the exposed left-most portion of the tissue; the otherwise tight structural organization of the soft tissues was slightly relieved by incision, and afferents tended to fall aside from the spinal cord, allowing us to delicately approach, using a ultra-fine micro forceps, and very gently clipping, using an ultra-fine micro scissors, those fibers. Left: View of the dorsal spinal cord; intact dura matter. Middle: Dural incision, followed by natural protrusion of dorsal rootlets. Right: Transected rootlets. **(b)** Mean movement (mov) traces obtained for each depth of ISMS ( $n \approx 50$  pulses per depth, under 1.5 % isoflurane) overlaid on a respective normalized (color-coded) amplitude map (same animal as in Fig. 3b, d-e). ISMS was performed upon conclusion of post-deafferentation recordings.

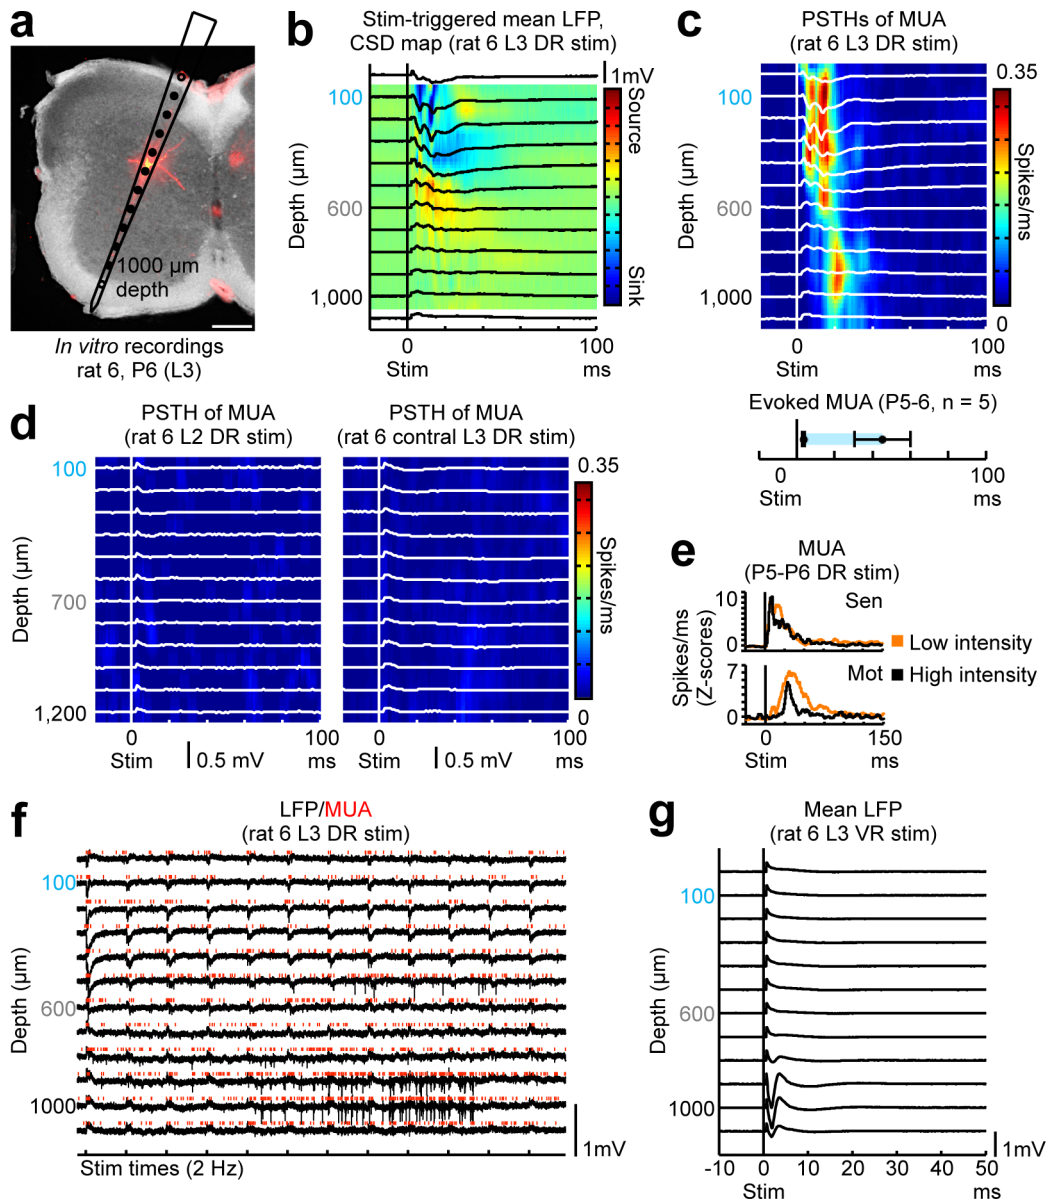

**Supplementary Figure 5 | *In vitro* activity patterns induced by dorsal root stimulation. (a)** Silicone-based electrode array track visualized on a transverse spinal cord section (P6 rat). Overlaid dark-field image and epifluorescence image (DiI, red) and to scale scheme of the electrode array, representing the typical anatomical positioning of different recordings sites in the *in vitro* spinal cord preparation (in this case, L3 segment), equivalent to that of the *in vivo* experiments. **(b)** Dorsal root (L3) stimulation (stim)-triggered mean LFP and CSD map ( $n \approx 50$  stimuli, single animal). Note the short-latency LFP deflections and current sinks evoked in the dorsal horn (sensory zone). **(c)** Associated normalized PSTHs of MUA, and average MUA response times, with graphed onsets and offsets

(mean  $\pm$  s.d., n = 5 animals). The sensory potential was associated with a MUA burst, at a latency of  $3.6 \pm 0.65$  ms and lasting  $42 \pm 14$  ms post-stimulus (mean  $\pm$  s.d., n = 5 animals), essentially limited to the dorsal horn (depth range of 100 - 400  $\mu$ m). **d)** Anterior dorsal root (L2) and contralateral dorsal root (L3) stim-triggered mean LFP and PSTH of MUA (n  $\approx$  50 stimuli, same animal as in **c**). Note that equivalent stimulations of anterior, posterior or contralateral roots evoked no or a weaker spinal response. **e)** Normalized PSTHs of MUA (Z-scores) demonstrating the effect of stim on firing rates in sensory (sen) and motor (mot) zones (mean of 3 animals). **f)** Original wide-band LFP traces denoting spinal responses to rhythmic dorsal root stimulation (single animal). Mot zones were weakly activated by single stimulus. However, rhythmic stimulation of dorsal roots (at least 5 stimuli at 1-2 Hz) evoked long-lasting rhythmic oscillatory bursts in mot zones, with coherence between mot units and oscillation. **g)** Ventral root (L3) stim-triggered mean LFP traces (n = 50 stimuli, single animal), revealing clear anterograde population spikes in ventral horn (mot zone). Generally, electrical stimulation of the respective ventral root evoked anterograde population spikes in the ventral horn (depth range: 900 - 1100  $\mu$ m, n = 5 animals), showing peak amplitude at  $2.8 \pm 0.45$  ms after stimulus (mean  $\pm$  s.d., n = 5 animals).



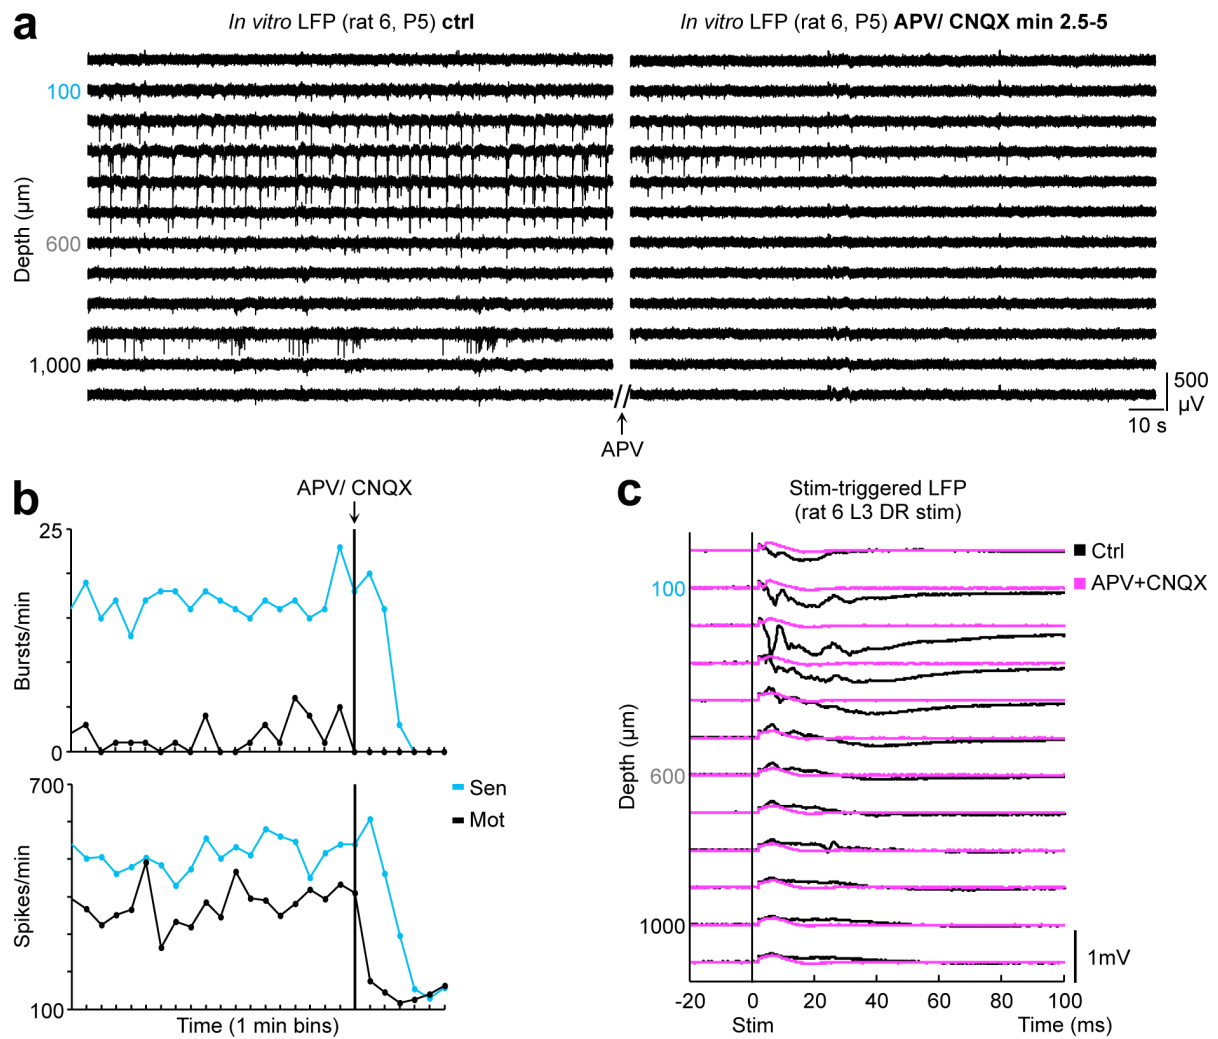

**Supplementary Figure 6 | Blockade of sensory and motor network events, *in vitro*, by APV and CNQX.** **a)** Original wide-band LFP traces exemplifying translaminae spontaneous spinal cord activity dynamics, *in vitro*, before and following bath application of the ionotropic glutamate receptor antagonists APV and CNQX, with suppression of network events in the after condition (single animal). **b)** Respective time course of APV and CNQX effect on bursting and spiking activity within the sensory zone (sen, light blue) and motor zone (mot, black). **c)** Dorsal root (L3) stimulation (stim)-triggered mean LFP traces across different laminae before (black) and after (magenta) APV and CNQX application ( $n \approx 50$  stimuli, single animal). Response suppression in the after condition confirmed its dependence on synaptic transmission.

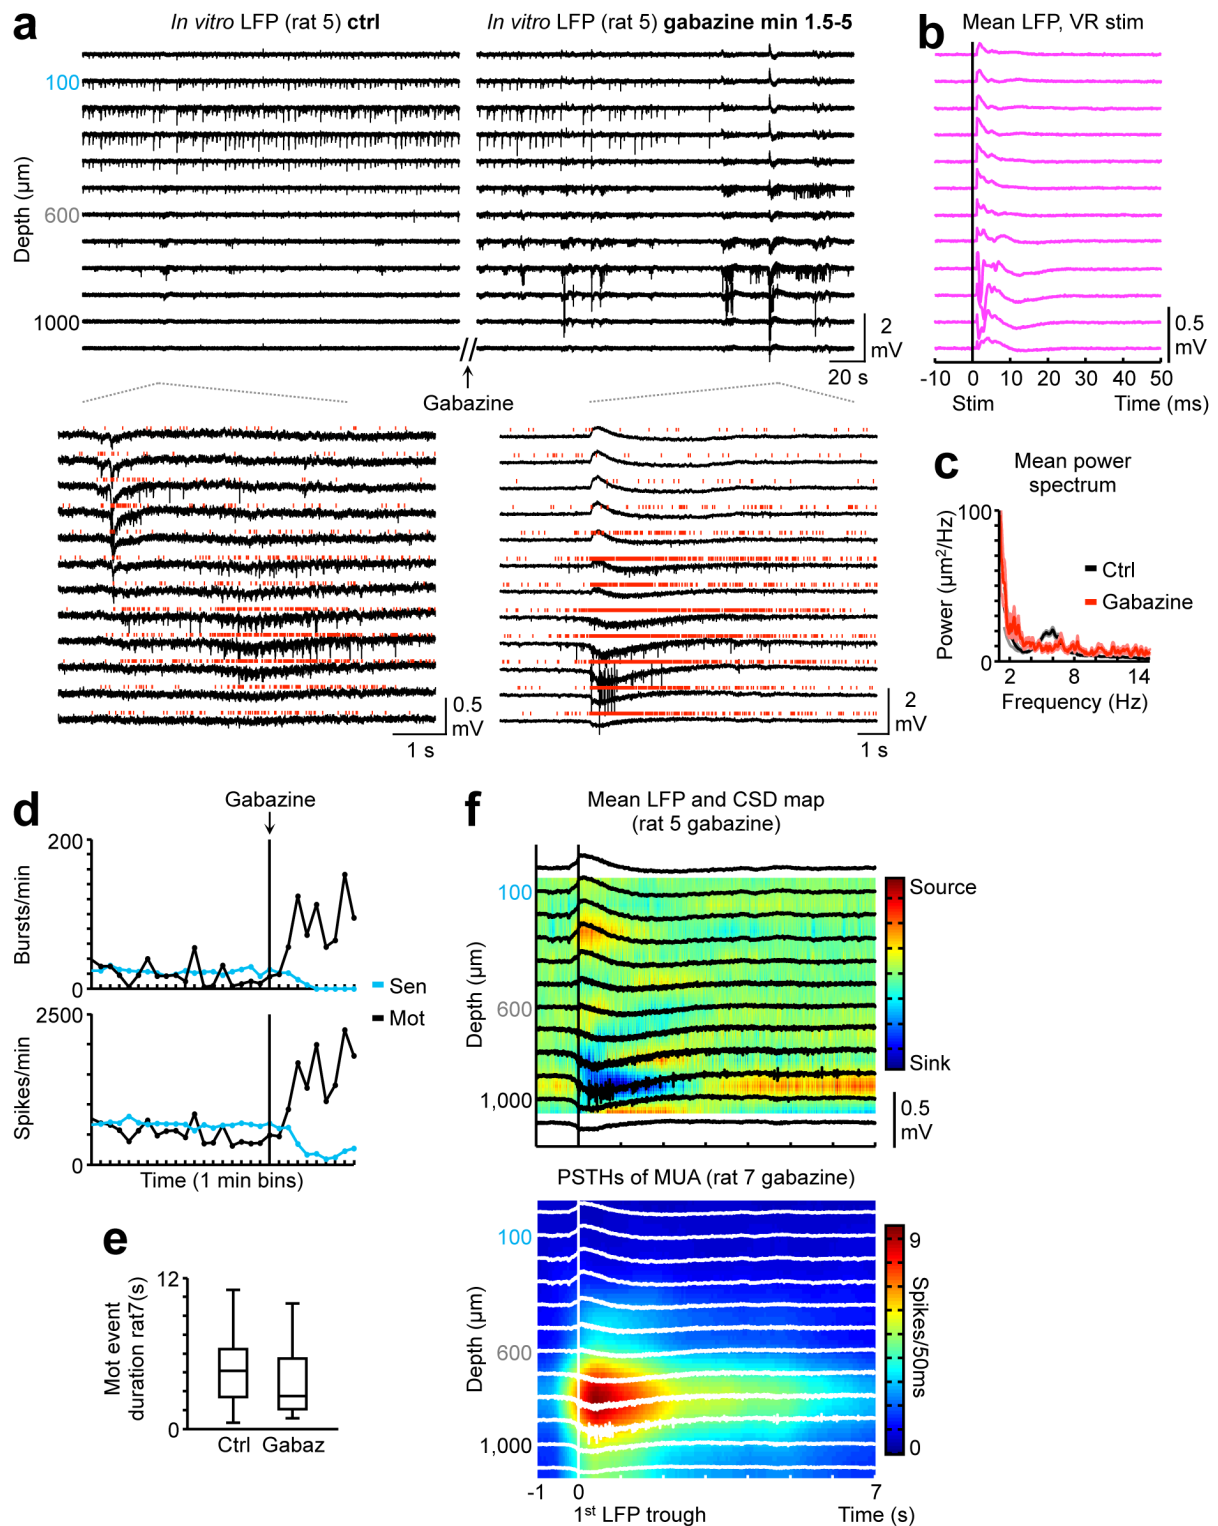

**Supplementary Figure 7 | *In vitro* spontaneous patterns of activity: suppression of sensory events and emergence of epileptiform motor events with gabazine. (a)** Top: Original wide-band LFP traces across different spinal cord laminae before and following bath application of the GABA(A) receptor

antagonist gabazine (single animal), demonstrating the observed drug-induced suppression of sensory events and emergence of epileptiform motor events. Bottom: Exemplary motor events prior to and after gabazine application. **(b)** Ventral root stimulation (stim)-triggered mean LFP traces, identifying motor neuron pool depths ( $n \approx 50$  stimuli, single animal). **(c)** Mean power spectrum of detected bursts referent to a selected motor zone (mot) recording site before and after gabazine application (mean  $\pm$  s.d., single animal), showing a loss of event structural stereotypy in the presence of the GABA(A) receptor antagonist. **(d)** Respective time course of gabazine effect on bursting and spiking activity within the sensory zone (sen, light blue) and mot (black). **(e)** Motor event duration for the before and after conditions (mean  $\pm$  s.d., single animal). **(f)** Top: Mean LFP triggered by motor burst occurring in the presence of gabazine and CSD map. Bottom: Corresponding normalized PETHs of MUA (single animal).

### **Supplementary references**

1. Watson, C., Paxinos, G. & Kayalioglu, G. *The Spinal Cord, 1<sup>st</sup> Edition: a Christopher and Dana Reeve Foundation Text and Atlas*. 290 (Academic Press, 2009).
2. Sitdikova, G. et al. Isoflurane suppresses early cortical activity. *Ann. Clin. Transl. Neurol.* **1**, 15-26 (2014).
